# Supplementary material for: Diabetes Fact Sheets in Korea, 2020: An Appraisal of Current Status
Source: PubMed Central journal article supplement — Diabetes Metab J. 2021 Jan 13;45(1):1–10. doi: 10.4093/dmj.2020.0254 (PMC7850879; doi:10.4093/dmj.2020.0254), 2021-01-13
Supplement: dmj-2020-0254-suppl2.pdf [file dmj-2020-0254-suppl2.pdf]

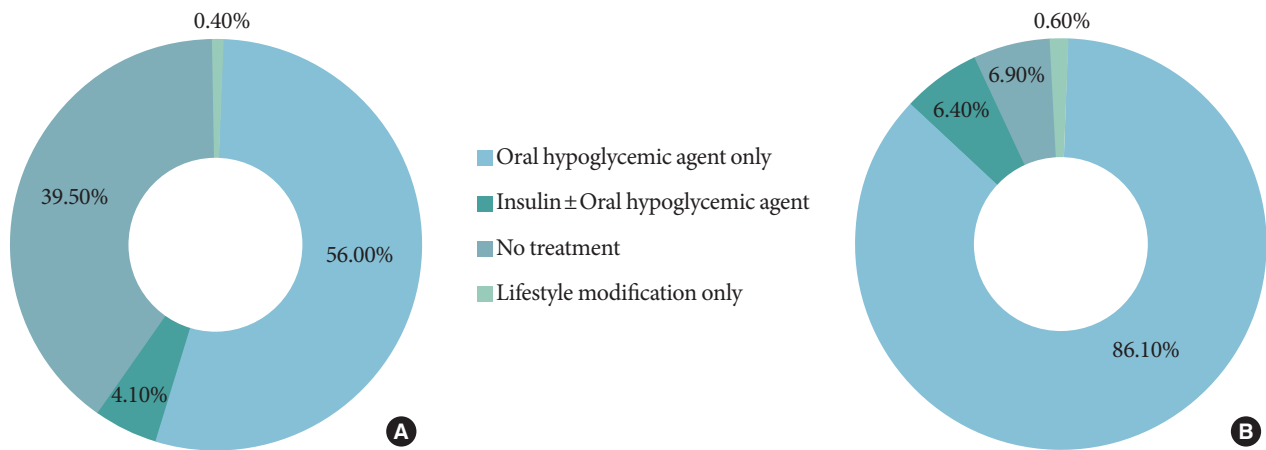

**Supplementary Fig. 1.** Estimated proportion of adults with diabetes according to type of treatment for hyperglycemia. (A) Total diabetes. (B) Diagnosed diabetes.
