# Supplementary figures and images for: Diabetes Fact Sheets in Korea, 2020: An Appraisal of Current Status
Source: PubMed Central journal article supplement — Diabetes Metab J. 2021 Jan 13;45(1):1–10. doi: 10.4093/dmj.2020.0254 (PMC7850879; doi:10.4093/dmj.2020.0254), 2021-01-13

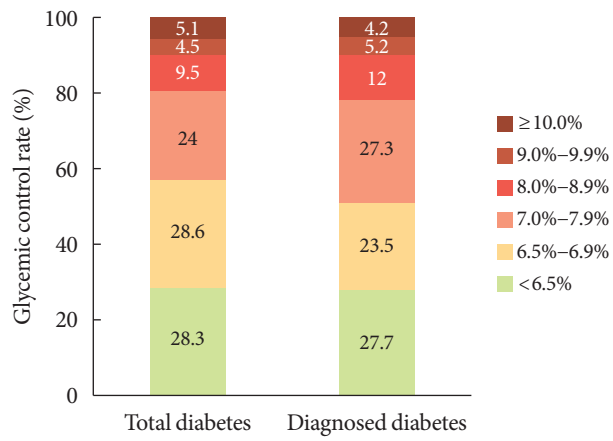

**Supplementary Fig. 2.** Glycemic control rate in diabetes. Values are presented as percentage.

Supplement: dmj-2020-0254-suppl3.pdf [file dmj-2020-0254-suppl3.pdf]
